# Supplementary material
Source: PubMed Central journal article supplement (PMC3767546)
Supplement: 1314137110_pnas.201314137SI.pdf [file 1314137110_pnas.201314137SI.pdf]

# Supporting Information

Wu et al. 10.1073/pnas.1314137110

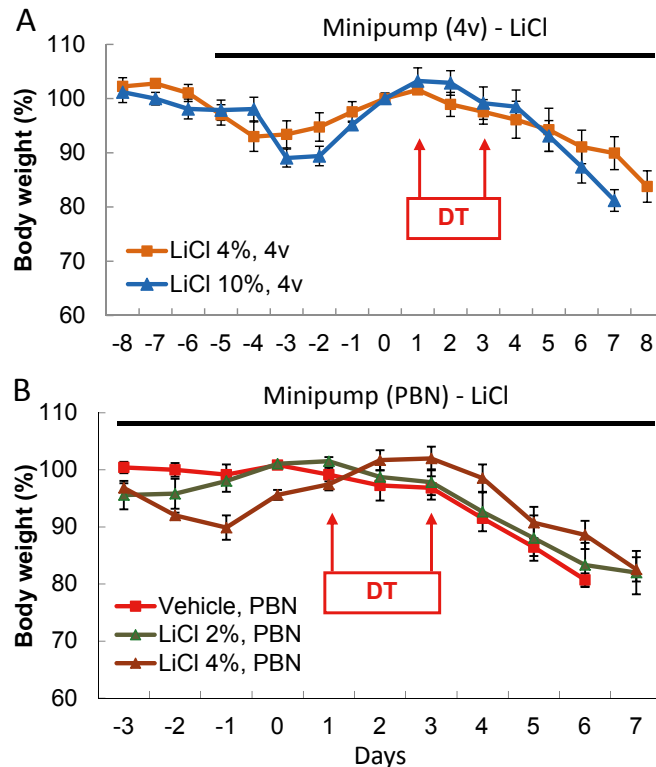

**Fig. S1.** Central administration of LiCl fails to rescue aphagia in mice in which agouti-related protein (AgRP) neurons have been ablated. (A) Body weight of *Agrp<sup>DTR/+</sup>* mice after chronic infusion of LiCl into the fourth ventricle (4v) ( $n = 8$  per group). Diphtheria toxin (DT)-mediated ablation of AgRP neurons was initiated 6 d after implantation of minipumps loaded with 4% (wt/vol) or 10% (wt/vol) LiCl. (B) Body weight of *Agrp<sup>DTR/+</sup>* mice after chronic infusion of LiCl bilaterally into the parabrachial nucleus (PBN) ( $n = 8$  per group). DT-mediated ablation of AgRP neurons was initiated 4 d after implantation of minipumps loaded with vehicle, 2% (wt/vol) LiCl, or 4% (wt/vol) LiCl. Results are shown as means  $\pm$  SEM.

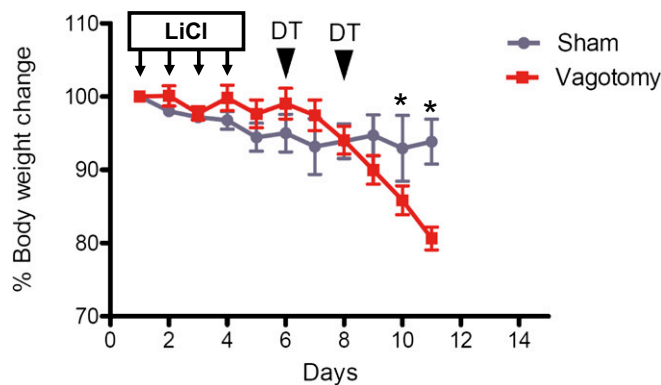

**Fig. S2.** Effects of systemic administration of LiCl on aphagia are abolished by gastric vagotomy in AgRP neuron-ablated mice. The graph shows the body weight of *Agrp<sup>DTR/+</sup>* mice treated with vagotomy or sham surgery. After recovery, LiCl (0.25 M,  $10 \mu\text{L}\cdot\text{g}^{-1}\cdot\text{d}^{-1}$ ) was administered i.p. for 5 d before DT-mediated ablation of AgRP neurons (arrowheads). \* $P < 0.05$ , ANOVA;  $n = 8$  mice per group. Results are shown as means  $\pm$  SEM.
